# Supplementary material for: Mechanically resolved imaging of bacteria using expansion microscopy
Source: PLoS Biol. 2019 Oct 17;17(10):e3000268. doi: 10.1371/journal.pbio.3000268 (PMC6797083; doi:10.1371/journal.pbio.3000268)
Supplement: S1 Data — (XLSX) [file pbio.3000268.s007.xlsx]

## Sheet: pre-expansion
L.plantarum	E.coli	A.tropicalis	A.intestini
0.664832	1.35811	0.831048	1.53472
0.898434	1.12465	0.949882	1.0431
0.479181	1.05804	1.1468	1.25114
0.832801	1.23461	1.16462	0.869644
1.18575	1.11721	0.651963	1.33475
0.80797	0.840983	1.18601	1.49328
0.953866	1.16332	1.04372	1.11505
0.823361	1.04949	0.795059	1.02947
0.693276	0.834883	0.869479	0.838239
1.11777	0.883008	0.819806	1.02111
0.849152	1.06986	0.861805	1.09986
1.05646	1.01039	0.97506	0.719653
1.18038	1.06362	1.13866	1.26723
1.17811	1.07606	0.750728	1.21584
1.00994	0.912157	1.17463	1.13406
0.914821	1.05279	1.15812	1.08022
0.739085	1.07459	0.85796	0.923125
0.927755	0.84298	0.870131	0.883726
0.831521	1.15072	1.07828	1.31741
1.06929	1.14615	0.676103	0.604917
0.816299	1.21462	1.09725	1.31532
1.03846	1.06671	1.05648	0.647399
1.12126	1.061	1.15457	0.947781
0.615634	1.3919	1.06685	1.22573
1.11251	1.06565	0.937649	0.848085
1.14173	0.973647	0.716093	1.03955
1.11741	0.774359	1.10505	1.29172
1.07703	0.928663	1.23006	1.08151
1.03869	1.3239	0.830783	1.54628
1.05061	1.41583	1.14626	1.24326
1.08396	1.09646	1.12642	0.933366
0.431038	1.12131	0.913919	1.19519
1.16001	0.934069	1.00686	1.07252
1.30152	0.622017	1.13607	1.25287
0.765434	1.30909	0.674751	1.32865
0.59589	0.82238	0.653545	1.20213
0.84573	0.942129	1.09182	1.12232
0.706089	0.809178	1.14297	1.08123
0.503493	0.764456	0.773382	1.06808
0.975563	1.36121	0.904661	1.15633
0.976752	0.868203	0.649325	0.81012
0.69561	1.02532	0.907826	1.28069
0.41689	0.832814	1.13721	0.658566
1.32407	1.1658	1.05936	0.859981
0.691042	1.05236	0.966086	1.37893
0.403336	0.958495	1.13643	1.19062
0.908153	1.04986	0.794631	1.42654
1.14194	1.27641	1.16575	1.46668
0.433004	0.86503	1.07605	1.17991
1.0192	0.639666	0.935269	1.00371
0.637787	1.51927	0.855962	1.16292
0.647441	1.10397	1.09947	0.898729
1.04771	1.02216	0.966752	1.2467
1.12165	0.981377	1.07108	1.32758
1.37855	1.06096	1.11613	0.943868
1.24815	1.29823	1.16672	1.09706
1.17249	1.14535	0.986215	1.03758
1.23917	0.965364	1.18357	1.39379
0.82288	0.716036	0.772276	0.74145
1.04669	0.844316	1.1533	1.04609
0.719072	1.47912	0.692695	1.20218
0.772534	1.16895	0.834494	1.5826
1.09918	0.808573	1.10579	1.01866
0.919419	0.97469	0.627228	1.1496
1.01489	0.806518	0.992399	0.840518
1.00067	0.879992	0.90165	0.96749
1.06565	1.28877	0.902804	1.0439
1.04758	1.26422	0.800279	1.19385
0.930485	1.09375	1.14453	0.808944
1.35088	1.08142	0.864029	1.07688
1.10063	0.976981	0.86491	0.961427
1.19479	0.768717	1.06967	1.256
1.02172	0.741819	1.09699	1.20331
0.978796	0.920269	1.13195	1.04754
0.553404	0.841025	1.1561	1.19783
1.11875	1.17525	0.93484	1.56999
0.824368	1.06946	1.03752	1.0103
0.724212	1.24458	1.16529	0.875688
0.976573	1.27213	0.792698	1.3259
0.82542	1.24859	1.19963	1.13683
1.22222	0.958175	0.876862	1.00422
1.11691	1.01535	1.19967	1.24416
0.430803	1.0202	1.02745	1.03292
0.875241	1.10184	0.87683	1.00998
1.18465	1.1135	0.768975	1.38882
1.03919	0.837793	0.620593	0.991087
0.98331	0.798779	0.60052	1.10141
1.02209	0.904799	1.0676	1.26568
0.805857	0.962408	1.04287	1.1808
1.06232	1.08133	1.13907	1.00587
1.17766	0.638166	0.878669	1.17222
0.661008	1.26854	0.956017	0.602859
0.829813	0.93177	1.04183	1.04037
0.89112	0.850352	0.888415	1.03051
0.943794	1.0593	0.967138	0.888607
0.59037	1.06761	1.08369	1.11672
0.443185	1.38173	1.05455	1.34501
1.17747	0.810825	1.11637	1.23994
1.06284	0.840209	0.804253	1.0033
0.801181	1.05757	0.867281	1.00432
0.919523	0.905964	1.07808	1.30135
1.34329	0.883977	0.896241	0.953022
1.04403	1.37614	0.704448	1.23807
1.38188	1.10053	0.856569	1.05687
1.2476	0.984386	0.910334	1.45704
1.17166	0.800218	0.660435	1.3536
0.975466	1.09387	1.10888	0.859766
0.824154	1.24153	1.12393	1.05607
1.01757	1.12144	1.18049	1.0734
0.900417	1.06761	1.08767	1.07735
0.644431	1.06481	0.837944	1.04838
0.699306	0.823836	1.19709	1.22262
1.0713	0.851312	0.906955	1.35721
0.857891	0.778654	0.907622	1.39641
0.996992	1.08865	1.02849	1.25842
0.925669	1.16413	1.19742	1.06022
0.661917	0.806996	1.07715	1.22993
0.905929	1.2625	1.18667	1.29494
1.1813	1.26214	0.750621	1.5753
1.02546	0.973798	0.840345	1.07463
0.923604	0.966874	1.17488	1.10156
0.594114	1.59955	0.632324	1.21298
1.19781	1.05198	1.00295	1.50087
1.30909	1.0744	0.870808	1.16458
0.921474	1.34043	1.01664	1.30323
1.2076	1.01004	1.18629	1.30866
1.12329	1.18509	0.856267	1.16299
0.893274	0.918933	0.935277	0.774252
0.961277	1.36483	0.734724	0.905043
0.811696	1.10601	1.14935	1.04099
0.887731	1.17727	1.0615	1.33067
0.874808	1.03088	0.83402	1.04209
1.14135	1.51009	1.16347	0.838548
1.14452	0.6772	0.918893	1.35851
1.18281	1.24794	1.1023	1.06312
0.905742	1.00326	0.744514	0.969626
1.00547	1.00112	0.607988	1.11722
0.85507	1.04868	0.74061	1.01412
0.85171	1.05686	1.0032	0.694085
0.755331	0.931311	1.05665	1.07276
1.12612	1.04542	1.19757	1.05394
1.10632	0.986673	0.940321	0.979825
0.748791	1.11605	0.8113	1.18215
0.934024	1.08231	1.04918	1.37869
1.2627	1.28732	0.917914	1.06685
0.578673	0.959077	0.972987	1.10165
1.01832	0.691485	0.668678	1.35511
1.25827	1.00123	1.00027	1.50711
0.728645	1.3673	0.65593	0.956494
0.454794	0.922768	0.641271	1.30702
1.11166	1.38182	0.627326	1.50602
0.479754	0.654654	0.933616	0.946984
0.809833	0.754045	0.652074	1.35083
0.555106	1.17688	0.85755	1.08703
0.926189	1.1453	1.08993	1.11059
1.08176	1.04875	1.14686	1.37776
0.776465	1.58221	0.795611	1.56584
1.12696	0.976891	0.837348	1.02728
0.955637	1.08799	0.660954	0.917964
0.857519	0.687078	0.735673	1.13662
0.985273	0.735311	1.14688	1.38454
1.02661	1.03728	0.851966	1.48682
1.35243	0.934879	1.1972	1.20866
0.589158	1.08013	1.00586	0.988409
0.644794	1.21993	1.0551	1.27936
1.19355	0.964271	0.797211	1.0881
0.755829	0.779412	1.15246	1.1627
0.770363	0.950734	0.6334	1.23858
0.988506	0.947048	0.615991	0.962454
1.3587	1.30348	0.941216	0.858656
1.18181	0.835604	1.1335	1.07433
1.22235	1.14936	0.967698	1.15557
0.897997	1.23318	0.976902	1.03238
1.10412	0.755974	0.623475	0.98524
0.684986	1.13256	0.992568	1.37124
1.06906	1.08806	0.87227	1.02541
0.814721	1.05279	1.12377	0.866883
0.706184	0.746634	1.19527	1.00759
0.895341	0.845469	1.06624	1.49261
1.12012	1.07805	0.786139	0.96007
1.12053	1.39907	0.794825	1.16519
1.12937	0.648836	0.731569	1.43338
1.15286	0.842928	0.633332	1.34366
0.985902	1.3589	0.978521	1.05961
0.415051	0.928773	1.18098	0.805244
0.995452	0.714482	1.159	1.14273
1.19199	1.16083	1.10541	1.0682
0.707609	1.01977	1.07365	1.26691
1.022	1.20395	1.18176	1.13159
0.613653	1.14317	0.899685	0.95751
0.923835	1.05547	0.788647	1.36378
0.685134	1.03061	1.16164	1.4337
0.686007	1.13321	1.09521	1.30347
0.640248	1.39916	1.16285	1.04386
1.37795	0.610768	0.925684	1.2333
0.406854	0.932313	0.703185	1.27068
0.581764	0.719111	0.747765	0.955137
1.18367	0.862966	0.751221	1.1392
0.678882	0.991037	0.747066	1.08771
1.18829	1.37407	0.627892	1.36395
1.14908	1.28335	1.07171	1.10245
0.941552	0.93983	0.841875	1.11696
0.941206	1.02139	0.842409	0.68137
1.00059	1.22231	0.99191	0.811187
0.877106	0.918017	1.16124	1.11389
0.692392	1.26747	1.05593	1.26779
1.1293	0.960182	0.919031	1.04397
0.636649	1.24365	1.12713	1.37549
1.30609	0.988211	1.02711	1.07485
0.645524	0.60383	0.83441	1.34954
0.908677	0.963734	0.683951	0.863883
0.902058	0.604136	0.956269	1.06992
0.838613	1.26109	1.00868	1.36768
1.03988	0.697708	1.02827	1.14645
0.860205	1.27557	0.76453	1.24137
1.16033	1.13723	0.859738	0.881913
0.824863	0.781534	0.692423	1.06381
0.802191	0.880035	1.09706	0.94303
0.950333	0.825844	0.733223	1.34024
1.05364	0.790417	1.04686	0.868884
1.19752	0.848473	1.05843	1.5197
1.17815	1.15938	0.905051	1.11266
1.01281	1.10197	1.08225	1.09423
0.948682	1.13673	1.10681	1.18425
1.15801	1.02592	0.776725	1.40003
1.14613	0.941826	0.733178	1.05552
1.23725	0.610843	1.16327	1.3653
1.02226	0.651939	0.77132	1.03801
1.15327	0.848261	1.00497	0.822437
0.977594	1.32008	1.07804	1.00445
1.11713	1.51533	0.9866	0.806719
0.935363	1.38059	1.23898	1.34164
0.759602	0.843851	0.750867	0.866842
0.483861	1.35167	1.04787	1.04502
1.31586	0.839359	0.920477	1.36464
1.04395	1.34759	0.987975	1.11177
1.3258	1.06485	0.79757	1.19895
0.919263	0.815594	1.13975	1.18716
1.07934	1.12106	1.14002	0.819828
0.619116	1.4449	1.17399	1.33963
0.743345	1.18398	0.75785	1.10626
1.13085	0.771703	0.87562	1.38746
1.01834	0.876039	1.05813	0.893358
0.744976	1.3329	1.23437	1.35508
1.13266	0.709835	1.12474	0.804293
0.659323	1.20866	1.01824	1.37057
0.825954	0.826059	1.18537	1.20685
0.8854	0.963826	0.987883	0.822967
0.454931	1.22076	1.01799	1.55123
0.880308	1.454	1.09415	1.35438
1.01892	1.28932	1.13838	1.22678
1.10706	1.04206	0.620441	0.809514
0.593476	1.08391	0.986296	1.15019
1.09824	1.04735	0.993488	1.5928
0.744133	1.3977	0.918745	0.881402
0.943707	1.15011	1.13546	1.13753
0.513623	0.807956	0.677015	1.23071
0.897627	0.92555	0.998822	1.26101
1.23211	1.21886	1.13299	1.57416
1.30062	0.706929	0.820553	1.33955
0.85123	0.879866	0.857233	1.29823
0.899843	1.05854	1.09973	0.982733
1.19212	1.23098	0.811243	0.824863
0.706427	0.988906	0.821473	1.32061
1.29814	0.982718	1.12707	1.11625
1.03063	1.24175	1.03642	1.46965
1.28764	0.652813	1.05732	1.40489
0.746692	1.05175	1.06016	1.00928
0.777525	0.948228	0.675765	1.07833
0.962675	0.927833	1.13358	1.08168
0.620222	1.27761	1.09128	1.19831
1.01727	1.17555	0.967349	1.10869
0.63741	0.61629	0.892828	0.943762
0.867214	0.937658	0.811507	0.917
0.739058	1.18018	1.01435	1.29305
1.39544	0.907021	1.11504	1.09919
1.28863	0.942637	0.766088	0.686047
0.771777	0.749564	0.991539	0.876357
1.29639	0.797658	1.03913	1.18737
0.910444	0.820261	0.88439	1.00672
0.897074	1.25784	0.674414	1.08833
1.02773	1.13575	0.641123	1.29071
0.473011	0.911018	0.706279	1.11489
1.03781	0.691396	0.616538	1.12424
0.992741	0.821225	0.83625	0.851267
0.990143	1.22017	0.785001	1.17871
0.775795	0.78228	0.802266	1.17687
0.944692	0.697446	0.8019	0.855828
0.879932	0.972225	0.658905	1.46359
1.11165	0.950295	0.906303	0.951251
1.1753	1.16602	0.82921	1.36779
0.578731	0.68521	0.966326	1.0215
0.658281	1.05474	1.08524	0.944328
0.457027	1.13153	0.891094	1.08374
0.855321	1.12154	0.904203	1.58165
1.01087	1.16291	0.930918	1.39164
1.02456	0.660972	1.06588	1.21911
1.22326	1.20645	0.951843	1.31475
0.658103	1.14152		0.90743
1.08784	1.09944		1.18398
0.403675	1.31587		1.3731
1.26823	0.711648		0.811042
0.900164	1.33206		1.3356
0.833864	1.01571		1.2153
0.864279	1.25859		1.04696
0.899266	1.48369		1.21796
1.03972	1.19092		0.897724
1.12632	0.918946		1.18448
0.489361	0.794003
1.08774	1.15461
0.902085	1.21351
0.803952	0.790228
1.03534	0.875709
0.711812	0.758454
0.718333	1.17239
1.0815	1.02891
1.00896	0.809022
0.776711	1.29736
1.30502	1.12962
0.692101	1.3111
0.651932	1.01866
1.31512	1.03867
0.643068	1.15479
0.497623	1.18992
1.39091	1.09773
0.996333	1.00526
1.01359	1.29779
0.626004	0.775643
0.910326	1.33796
0.579038	1.06963
0.655815	1.26854
1.07346	1.0703
1.08531	1.08564
1.24175	0.916494
1.12141	1.05848
0.827984	1.18423
0.861487	1.19944
0.767147	0.88329
1.04485	1.29917
0.724848	1.08688
1.32147	1.0785
0.892471	1.14784
1.09855	1.03709
1.06067	1.34152
0.986024	0.865328
0.674388	0.78253
0.891408	1.2475
0.486778	1.20136
1.29762	0.780825
0.612602	0.763315
0.748632	0.842198
0.768594	0.855487
1.08353	0.971897
1.23493	1.39691
0.993238	0.606668
1.21333	1.01561
0.841642	1.07006
0.989439	1.23627
0.425817	1.13712
1.36988	1.34855
0.953144	1.02836
0.97108	0.959218
0.864042	1.38147
0.892259	1.09017
1.06475	1.21611
1.28871	0.601858
1.11471	1.09773
0.902378	1.38006
0.964093	0.923757
1.09993	1.21892
1.21795	0.834367
1.15031	1.18579
1.05034	1.3036
0.694253	1.13927
1.12607	1.19486
0.600859	1.28209
0.867575	0.800458
0.632571	1.04134
1.06692	0.809764
0.628862	0.739029
1.32691	1.01454
1.11317	1.09538
0.875761	1.19136
0.522878	0.804894
0.791323	0.833689
0.782477	1.35981
1.01957	0.68302
0.676676	0.613067
1.11135	1.07752
1.11764	1.13929
1.01134	0.920443
0.465959	1.01117
1.29706	1.25632
1.38722	1.22836
1.15939	0.915002
0.776392	0.710068
1.15315	1.03848
0.591858	1.17861
0.402405	1.2835
0.851124	0.952701
0.929306	0.920235
0.485049	1.19236
0.662948	0.91123
1.05012	0.960958
0.45366	1.33927
0.791024	1.36932
1.14218	1.37688
1.37223	1.2493
1.09528	1.17828
0.689269	1.06913
1.21686	0.736058
1.36174	1.14965
0.886524	0.670265
0.641918	1.23892
1.27466	1.24766
0.994366	1.10524
1.08704	1.14587
1.0472	1.01458
0.454036	1.17543
0.740046	1.08689
1.10733	1.07075
0.877976	1.03076
1.29233	0.937185
1.08542	1.26089
1.04784	1.38932
1.157	1.39217
0.869991	1.12723
0.991779	1.0029
1.07564	1.19631
0.881622	1.09281
0.920322	1.25784
1.27653	1.13542
0.950923	0.668757
0.842648	0.776337
0.598106	1.01805
1.0133	0.67786
1.32918	1.01148
0.82203	0.893787
0.909349	1.17519
1.11055	0.660044
1.00816	1.35602
0.931721	1.00387
1.23728	1.06054
0.732032	0.629441
0.714066	1.35634
1.13519	1.06055
1.13876	1.34887
0.556175	0.69703
1.19619	0.825372
0.859742	0.74551
1.35031
0.627437
1.08259
0.885142
1.00089
0.424417
1.08709
0.453762
1.23854
0.893771
0.508554
0.76866

## Sheet: post-expansion
L.plantarum	E.coli	A.tropicalis	A.intestini
1.04654	1.00595	1.84742	0.854025
1.15771	1.13082	1.73787	1.01451
1.62449	1.16947	2.39685	1.75822
1.15087	1.1192	2.33511	1.15856
1.17489	1.01115	2.27251	1.15839
0.85229	0.981714	2.42482	1.31339
1.06214	1.0805	2.08505	1.41475
0.823453	1.53215	2.2602	1.24504
1.20422	1.59577	2.45156	1.23115
1.09079	1.38968	2.11474	1.32727
1.25587	1.2139	2.1223	0.983527
0.906287	0.954596	2.59882	1.48061
1.17593	1.07544	2.48141	1.0715
1.17142	1.2867	2.00503	1.75286
1.62138	1.06556	1.82931	1.03399
0.874525	1.49826	2.37519	1.15872
1.41471	0.815711	1.9809	1.31636
1.25584	1.36333	2.49432	1.31998
1.7083	1.03815	1.81516	1.51115
1.31863	1.21204	2.59751	1.52378
1.06483	1.35547	1.74398	0.808158
1.25199	1.07583	2.14281	1.3659
1.19962	1.37656	1.74823	1.07406
0.854941	1.15644	2.48793	1.32635
1.22863	1.39514	1.67002	1.35658
1.4924	1.44702	2.03168	1.00131
1.10472	1.4743	2.02312	1.23278
1.63771	1.36718	2.27998	1.39495
1.01819	1.11223	1.8312	1.46322
1.29557	0.999751	1.82832	1.74113
1.01458	1.48458	1.98511	1.17322
1.15443	1.19186	1.89383	1.28753
1.16676	1.13775	2.17706	1.05481
1.36554	1.0097	2.11436	1.10684
1.36125	1.37067	1.94683	1.16172
1.15413	1.30448	2.11488	1.32371
0.960617	0.878773	2.10304	1.33873
1.62609	1.33898	2.13451	1.28183
1.39875	1.17275	1.96074	0.80612
0.894139	1.08621	2.01243	1.01093
1.35412	1.10703	2.24537	1.24307
1.07264	1.03305	2.07534	1.37877
1.34436	1.22612	2.07045	1.40048
1.3196	1.22005	2.01478	1.01863
1.00685	0.989471	2.30112	1.4344
1.3067	0.95916	2.00041	1.38247
1.13802	1.34724	2.35315	1.71371
1.11076	1.33019	2.59028	1.39928
1.18545	0.915633	2.12307	1.22438
1.16948	1.16637	2.00647	1.09005
1.10905	1.33915	1.97438	1.09116
1.47047	1.19912	2.44631	1.11803
0.973976	0.833069	2.66182	1.25922
1.27508	1.23917	2.77058	1.5557
1.5618	1.33542	2.30457	1.17889
1.7367	1.19799	2.22112	1.35615
0.868569	1.09626	2.23752	1.72333
1.01974	1.01589	1.65208	1.08371
0.837882	1.27877	2.28045	1.71777
0.849671	1.17519	1.8588	1.44409
0.931868	1.2555	2.0331	1.06808
0.85288	1.25974	2.23621	1.13439
1.29	1.20567	2.07454	0.947015
0.8066	1.00233	2.05491	1.41341
1.02841	1.03082	2.04735	1.51451
0.898979	0.863336	2.59645	1.12709
0.805031	0.963166	2.08405	1.30109
0.740553	1.28801	2.11547	1.26035
1.31935	1.1467	2.15813	1.08864
1.0124	1.40828	1.60197	1.23924
1.34173	1.51526	1.89416	1.1859
1.39848	1.52043	2.35178	1.23777
1.37018	1.21924	2.30421	1.2813
1.39666	1.18753	2.54893	1.38209
1.61861	1.56925	2.12689	1.10534
1.13749	1.23191	2.07788	1.13356
1.21525	1.18987	2.50591	1.30924
1.51005	0.905995	2.00099	1.30831
1.00779	1.36161	2.19222	1.37805
1.46568	1.35616	1.83189	1.26566
1.36726	1.32821	2.20435	1.01513
1.23251	1.18958	2.35934	1.09393
1.48472	1.35873	2.15794	1.38353
1.22584	1.28103	2.05446	1.15621
1.35298	1.4535	2.29466	1.1763
1.1085	1.29482	2.01511	1.11725
0.786966	0.868738	2.38055	1.3479
1.1352	1.3647	2.32181	1.3021
1.35114	1.01341	2.15002	0.920988
1.34675	0.878452	2.11039	0.83579
1.20662	1.27495	2.13186	1.72289
1.32882	1.13538	2.04082	1.35975
1.24649	0.829714	2.20309	1.27276
0.875505	1.17383	2.41354	1.31301
1.64576	1.04295	2.13052	1.30593
1.52906	0.946307	2.24451	1.40328
1.37459	1.25892	2.12655	1.01084
1.30444	1.59126	2.4423	1.23134
1.03321	1.1739	2.31034	0.905546
1.36226	1.2707	2.1168	1.24811
1.23523	0.943421	2.3079	1.21378
0.871335	0.863121	2.16495	1.06422
1.34735	1.27015	2.26415	1.64796
1.1353	1.20035	2.40519	1.4785
1.21409	1.26828	2.1504	0.969479
1.26931	1.41743	1.87048	1.25767
1.07152	1.50401	2.1077	1.58312
1.45816	1.33856	2.03137	1.13819
1.00855	0.939533	1.97252	1.50466
1.52274	1.36243	2.56353	1.33879
1.28511	1.20611	1.96441	1.47938
0.733715	1.15238	2.59607	1.31739
1.24061	1.21417	1.88037	1.5112
1.0199	1.05086	2.22585	1.26906
1.27387	1.01861	2.2276	1.50327
1.37623	1.35432	1.97759	1.10721
1.21899	1.0514	2.2358	1.55444
0.868395	1.38894	2.17018	0.964844
1.44379	1.04434	1.83617	1.30201
1.2327	1.3088	2.13281	1.25647
1.1037	1.20647	2.20373	1.4562
1.45484	1.365	2.10895
1.39679	1.1672	1.83259
1.39167	1.08757	2.35044
0.826337	1.29717	2.29454
1.04094	1.2278	1.97923
0.684355	1.2287	2.34559
1.00978	1.2152	2.29525
1.26769	0.838046	2.06305
1.2908	1.06239	1.8874
0.860881	1.29205	2.34135
1.20327	1.23306	2.01687
1.18245	1.10178	2.15958
0.89705	1.37234	2.18673
1.354	1.14113	2.05399
1.17978	1.34511	2.06124
1.31015	1.25973	2.16829
1.38243	1.28434	2.13903
0.997727		2.01191
1.46479		1.83687
1.51353		2.27597
1.16931		2.00093
1.13866		2.38022
1.10825		2.11815
1.4861		2.26741
0.944736		2.238
1.0831		2.35677
1.15176		2.08966
1.34775		2.23932
1.50104		1.93732
1.18065		2.42195
1.15549		1.85432
1.00506		1.89843
1.36679		2.19647
0.971617		2.23424
1.31788		2.17543
1.20741		2.2882
1.0435		1.94572
1.14514		2.56077
0.881779		2.20427
0.948903		2.35365
1.343		2.09081
0.722956		2.37201
1.4055		2.79035
0.863276		2.52825
1.31217		2.01841
1.00929		1.94865
1.16848		2.38711
1.06619		2.06144
1.28663		2.07631
1.29093		2.27064
1.33675		2.15337
1.33813		2.385
1.36325		2.02325
1.0359		2.32178
0.886476		2.00615
1.46122		1.87828
1.11744
0.842896

## Sheet: +lysozyme
L.plantarum	E.coli	A.tropicalis	A.intestini
1.10118	2.46654	2.824	3.94662
1.06965	2.26632	2.78122	3.9241
1.13567	1.75253	2.96577	4.04538
1.03078	2.44143	2.98627	4.00134
1.47424	2.28768	2.92717	3.95086
1.3258	1.71782	2.79549	3.70383
1.21633	2.02609	2.89211	4.03222
1.35161	2.24233	3.20388	3.85829
1.5143	2.22166	3.27313	4.03021
1.33194	2.21331	3.06494	3.71729
1.07265	2.37271	2.87865	3.81516
1.20728	2.17811	2.94857	4.3298
1.02356	2.58155	3.25386	4.35543
1.24226	2.2709	3.39232	3.85294
1.25452	2.17044	2.88925	4.2672
1.10833	2.37145	3.17656	3.86243
1.22524	1.91292	2.821	4.12759
1.01074	2.08427	2.8265	4.1594
1.06786	2.20907	3.09849	4.01408
1.11361	1.97858	3.24007	3.65201
0.981025	2.1351	2.98583	3.99966
0.83617	2.4822	2.93502	3.9793
1.32626	2.09736	3.23627	3.99569
1.28388	1.94653	3.13826	4.1964
0.97219	2.36871	2.99678	3.52112
1.02754	2.42375	2.49046	3.82285
0.900791	2.08533	3.40229	3.45025
0.86765	2.15969	3.2741	3.60199
1.03	2.54607	3.12218	3.99224
1.26625	2.22275	3.0508	3.47795
0.874825	2.59584	2.90009	3.8644
1.03487	2.26698	3.03558	3.47863
1.15689	1.9266	2.95253	3.63169
1.12837	1.71491	3.36768	4.16462
1.18669	2.3083	3.3468	4.275
1.31805	2.07698	2.8389	4.1915
1.33617	2.23188	2.81143	4.17673
1.44485	1.81657	2.86315	4.25896
1.19051	2.27238	3.38743	3.53249
0.92415	2.19193	2.8295	3.79217
1.07942	2.55345	2.47105	4.23303
1.18668	2.05526	3.08154	4.12008
1.02944	2.19521	2.93796	4.16359
1.07747	2.36417	3.112	3.80443
1.40433	2.22227	2.53045	4.03173
1.30172	2.23276	2.93591	3.82557
1.01956	2.15702	3.19925	4.23387
1.04818	2.39005	3.076	3.67954
1.05179	2.12665	3.00968	4.31155
1.19111	2.20036	2.89605	4.1933
1.1492	1.92641	2.90332	3.42268
1.02367	2.54619	2.91625	3.77721
0.860683	2.21897	2.85753	3.99224
1.458	2.29873	2.91183	4.40571
0.920814	2.35946	3.00387	4.14241
0.88995	2.14278	2.47866	4.28837
1.22101	2.3607	3.04488	3.78075
1.29378	2.116	3.1306	3.97536
0.985003	2.33798	2.68301	3.75236
1.1403	2.34293	2.96726	3.90704
1.2661	2.39405	3.07448	4.27212
0.775255	2.17463	2.92842	4.29016
1.30587	1.9702	2.58902	4.02781
1.43981	2.2142	3.30601	3.83767
1.10018	2.51848	3.0003	4.03046
1.18476	2.19891	3.26588	4.38044
0.801286	2.12239	3.2857	4.52029
1.49686	2.35572	2.62664	3.67218
1.34702	2.52679	2.97677	3.59129
1.10985	1.83396	3.07587	3.86306
1.30715	2.40083	3.08743	4.13444
1.17334	2.15926	2.91753	4.51774
1.49137	2.08574	3.272	3.9094
0.806985	2.29976	3.28341	4.4045
0.832646	2.12613	3.2319	4.01297
1.25088	2.15274	3.2333	3.91328
0.83374	2.62464	2.69294	3.65298
0.926503	1.95874	3.22874	4.03393
1.37203	2.30325	2.90548	4.24359
0.886916	2.37686	3.06485	4.07199
1.0165	2.29255	3.26128	3.93192
1.26176	2.16411	3.12673	3.89755
1.35182	2.37009	2.8212	4.10464
1.30254	2.44709	3.2561	3.61309
1.31796	2.21126	2.86866	4.26357
1.21689	2.13087	3.02402	3.98506
0.825405	1.98504	2.98184	4.34076
0.976852	2.11926	2.61503	3.67675
1.18048	2.3349	3.16148	4.06622
1.32117	2.03092	2.94222	3.93526
1.28163	2.03491	3.06185	4.16645
0.961245	2.035	3.12824	3.76754
1.468	2.33606	3.01151	3.60132
0.991681	2.43495	3.1287	4.16796
1.37044	1.88926	2.82841	3.9154
1.45646	2.32082	3.11524	4.31365
1.2683	2.21925	3.0291	4.24945
1.1322	2.24218	3.36045	4.38258
0.976764	2.24995	3.32272	3.61058
1.25294	2.24659	2.86359
1.36674	2.24329	3.14428
1.30902	2.00831	3.36492
0.959075	1.72984	2.8215
0.812444	1.87427	2.8291
0.993378	2.08306	2.91361
0.897531	2.44761	2.9197
1.37919	2.33006	3.02751
1.26116	2.12092	3.22253
1.39914	2.02679	2.71431
0.975	2.3049	2.61763
1.35118	2.4235	2.8212
0.827721	1.97345	2.72288
1.15624	2.33486	3.32881
1.00723	2.08397	3.16364
0.950381	2.38576	2.85865
1.15051	2.08037	3.01693
1.40421	2.11535	3.26359
0.839779	2.23542	3.07889
1.19058	2.01784	3.16905
1.03226	1.90058	3.12533
0.813625	2.2929	3.17001
1.29554	2.081	3.16271
1.30349	2.09444	2.86297
1.42405	2.42672	2.97721
0.857386	2.36187	3.01509
1.00662	2.53648	3.10746
1.1324	2.32916	2.60776
1.18452	2.3906	2.92335
1.25618	1.89282	3.31381
0.875919	2.36709	2.94636
1.042	2.11376	2.53473
1.12354	2.12288	2.669
1.20165	2.63751	3.0344
1.28307	2.60543	2.91501
1.29697	2.08509	3.10392
1.03767	1.98834	2.7527
1.4767	2.4048	2.64639
1.01964	2.08983
0.942107	1.9096
1.45859	2.18906
1.09217	1.87565
0.901734	2.49364
1.20686	2.15333
0.852659	2.25457
0.873671	2.55102
1.14062	2.29533
0.841524	2.37031
0.946461	2.12404
1.24916	2.37842
0.85368	1.7222
1.17791	2.18507
	2.33988
	2.14853
	2.06275
	2.43283
	2.21844
	1.99472
	2.16258
	2.44479
	2.29398
	2.59231
	2.63061
	2.31708
	2.16412
	2.38078
	2.26415
	2.18175
	2.17732
	2.20501
	2.37611
	1.98605
	2.43531
	2.43184
	2.14878
	2.0843
	2.2738
	2.16418
	1.86625
	2.1566
	1.93338
	2.52507
	2.08976
	2.0987

## Sheet: +mutanolysin
L.plantarum	E.coli	A.tropicalis	A.intestini
3.37431	4.00304	3.37057	3.98737
3.8575	3.91072	3.34863	3.91772
3.88383	3.67526	3.39013	3.42794
4.19157	3.60318	3.7473	4.44466
3.7196	3.95045	3.27399	3.83002
3.38414	3.85915	3.46741	3.98975
3.93134	4.00254	3.06588	3.68033
3.47732	4.11801	3.50034	3.60513
3.22735	3.281	3.70881	4.10877
3.9409	3.7962	3.48283	3.7152
3.90806	3.83033	3.77248	3.99916
4.28929	3.74602	3.8882	3.98483
4.04429	4.0457	3.88943	3.89579
3.94984	3.70711	3.07442	4.35557
3.65692	3.69156	3.54309	3.64853
3.61296	3.99695	3.11442	3.86122
3.50131	4.07564	3.93179	4.03521
3.23724	3.66102	3.58708	4.18906
3.94313	4.02404	3.66862	4.11781
3.88851	3.66934	3.65658	4.58436
3.66709	3.75254	3.2504	3.75698
3.75594	3.78791	3.56884	4.39916
3.83927	4.16701	3.48274	4.1316
3.98001	3.97581	3.68883	4.28804
3.84172	3.43732	3.51747	3.40717
3.98793	3.75707	3.75832	3.93447
3.73211	3.26308	3.57393	3.72171
3.71248	3.74011	3.74729	4.11953
3.873	3.4053	3.50578	3.64324
3.96152	3.93081	3.63084	3.97817
3.56936	4.17904	3.40925	4.20495
3.83099	3.36263	3.8962	3.81799
3.38589	3.90129	3.44649	4.08725
3.83015	3.91542	3.92415	3.81407
3.30149	3.43093	3.83881	3.83194
3.86836	3.6327	3.59212	3.835
3.93771	3.67628	3.42266	3.72588
3.55593	3.91486	3.5348	4.4749
3.97204	3.58508	3.42296	3.78669
3.47749	3.32365	3.71278	3.67482
3.94726	3.74613	3.23487	3.54509
3.71349	3.56044	3.738	4.07059
3.44929	3.92578	3.28485	4.4628
3.65126	3.9564	3.62245	4.27299
3.6851	3.87635	3.49525	3.94821
4.01019	3.67338	3.25435	4.14951
3.66621	3.43936	3.27256	4.3261
3.78238	3.21717	3.61896	4.39323
3.22952	3.24347	3.60027	4.1577
3.89145	3.90699	3.41807	4.03252
3.88888	3.62287	3.74069	4.04692
4.20679	3.98401	3.78397	3.97139
3.80839	3.8952	3.11455	3.77442
3.58746	3.969	3.71654	3.80496
3.69401	3.99463	3.75628	4.16395
3.37572	3.95595	3.42089	3.94314
3.73799	3.70412	3.59792	3.77864
4.3456	3.76216	3.9253	3.8296
3.98778	3.8079	3.54373	4.10995
3.90619	3.9	3.63227	3.98225
3.96408	3.72616	3.0882	3.6087
3.82499	3.93583	3.72122
3.97418	3.76787	3.59212
3.67657	3.64605	3.25692
4.0732	3.72836	3.42706
4.02699	3.76993	3.82761
3.46017	3.31089	3.3253
3.89812	4.09647	3.72602
3.98013	3.8099	3.224
3.77768	4.1266	3.78238
3.60588	4.19991	3.27202
4.11012	3.55561	3.94147
3.80436	3.97166	3.56309
3.67435	3.57531	3.76131
4.26311	3.40623	3.47276
3.97	3.93045	3.63465
3.43191	3.42278	3.74889
4.04769	3.50994	3.0722
3.73365	3.81919	3.60799
3.43683	3.91099	3.36042
3.53193	3.37187	3.98787
3.91013	3.92811	3.07021
3.99254	3.98075	3.49226
4.27062	3.77954	3.46927
3.60321	3.95943	3.45332
3.93877	3.83687	3.41554
3.79441	3.65234	3.46026
3.8885	3.97659	3.45189
3.20247	3.67738	3.64892
3.97348	3.72902	3.71869
3.71279	3.96444	3.88571
3.75997	3.84711	3.66579
4.34969	3.3103	3.61055
4.32428	3.60576	3.92824
3.65589	3.83194	3.79391
3.42234	3.72095	3.19847
3.6396	3.79316	3.92404
4.14705	3.69656	3.36766
3.74748	3.80501	3.49314
3.75684	3.9439	3.72046
3.79616	3.89854	3.53527
3.97822	3.22307	3.65092
4.28448	3.80302	3.44987
4.08448	3.91936	3.67862
4.06956	3.89226	3.14357
4.05119	3.94588	3.72974
3.91968	3.88446	3.97755
3.34441	3.72396	3.66577
3.65716	3.95739	3.74265
3.86612	3.84029	3.73655
3.76106	3.82639	3.07607
3.62088	4.18805	3.51081
3.94257	3.80979	3.93193
3.69074	3.36898	3.56932
3.97138	3.68658	3.3955
3.61195	3.72385	3.55147
4.15423	3.28349	3.0922
3.40204	3.80797	3.97032
4.18087	3.79004	3.59888
3.78625	3.62435
3.67192	3.79744
4.11563	3.90068
3.75594	3.59289
3.70106	3.80118
3.81347	3.67162
3.94925	3.84207
3.63549	3.99893
3.47171	3.9787
3.77015	3.72731
3.89822	3.84103
3.46589	3.94707
3.72319
3.80131
3.67259
4.14083
3.9903
3.60756
4.15112
3.41718
