# Supplementary material for: Mechanically resolved imaging of bacteria using expansion microscopy
Source: PLoS Biol. 2019 Oct 17;17(10):e3000268. doi: 10.1371/journal.pbio.3000268 (PMC6797083; doi:10.1371/journal.pbio.3000268)
Supplement: S2 Data — (XLSX) [file pbio.3000268.s008.xlsx]

## Sheet: pre-expansion
position	normalized intensity
-3	0.183267
-2.88889	0.216614
-2.77778	0.262506
-2.66667	0.305004
-2.55556	0.356056
-2.44444	0.4291
-2.33333	0.531649
-2.22222	0.658255
-2.11111	0.783681
-2	0.859231
-1.88889	0.874279
-1.77778	0.842406
-1.66667	0.785303
-1.55556	0.729673
-1.44444	0.704737
-1.33333	0.73661
-1.22222	0.81939
-1.11111	0.895677
-1	0.930944
-0.888889	0.920466
-0.777778	0.884315
-0.666667	0.851263
-0.555556	0.855247
-0.444444	0.894645
-0.333333	0.942454
-0.222222	0.962522
-0.222222	0.952781
0	0.920319
0.111111	0.898331
0.222222	0.920171
0.333333	0.964586
0.444444	0.994837
0.555556	1
0.666667	0.980522
0.777778	0.917809
0.888889	0.820275
1	0.754315
1.11111	0.775713
1.22222	0.847426
1.33333	0.892873
1.44444	0.895235
1.55556	0.875167
1.66667	0.841522
1.77778	0.813781
1.88889	0.792976
2	0.795486
2.11111	0.829127
2.22222	0.88712
2.33333	0.914566
2.44444	0.86292
2.55556	0.712263
2.66667	0.495351
2.77778	0.305741
2.88889	0.203482
3	0.195219

## Sheet: post-expansion
position	normalized intensity
-3	0.0392157
-2.925	0.0387804
-2.85	0.0448784
-2.775	0.0431373
-2.7	0.0435725
-2.625	0.0470588
-2.55	0.064051
-2.475	0.0845333
-2.4	0.168627
-2.325	0.32549
-2.25	0.517647
-2.175	0.739871
-2.1	0.930718
-2.025	0.957733
-1.95	0.957733
-1.875	0.933333
-1.8	0.884533
-1.725	0.639651
-1.65	0.384314
-1.575	0.263616
-1.5	0.194773
-1.425	0.151635
-1.35	0.127671
-1.275	0.179086
-1.2	0.384314
-1.125	0.739871
-1.05	0.886275
-0.975	0.92549
-0.9	0.755557
-0.825	0.483659
-0.75	0.27451
-0.675	0.175165
-0.6	0.102831
-0.525	0.156863
-0.45	0.256208
-0.375	0.376471
-0.3	0.470588
-0.225	0.471894
-0.15	0.360784
-0.075	0.253596
0	0.158604
0.075	0.0993451
0.15	0.0875804
0.225	0.134639
0.3	0.239651
0.375	0.521569
0.45	0.857953
0.525	0.986929
0.6	0.958169
0.675	0.813945
0.75	0.454902
0.825	0.180392
0.9	0.091502
0.975	0.12331
1.05	0.184314
1.125	0.294988
1.2	0.48889
1.275	0.649675
1.35	0.750325
1.425	0.717212
1.5	0.52549
1.575	0.341612
1.65	0.235729
1.725	0.164706
1.8	0.147714
1.875	0.107188
1.95	0.0718941
2.025	0.0749451
2.1	0.126796
2.175	0.364706
2.25	0.785184
2.325	0.968627
2.4	1
2.475	0.99782
2.55	0.960784
2.625	0.709804
2.7	0.264925
2.775	0.0753804
2.85	0.0235294
2.925	0.0117647
3	0.00479216
3.075	0.00784314
